# Supplementary material for: The mechanism of pseudouridine synthases from a covalent complex with RNA, and alternate specificity for U2605 versus U2604 between close homologs
Source: PubMed Central journal article supplement (PMC3919597; doi:10.1093/nar/gkt1050), 2013-11-07
Supplement: supp_gkt1050_nar-01951-r-2013-File011.pdf [file supp_gkt1050_nar-01951-r-2013-File011.pdf]

## Supplementary Data

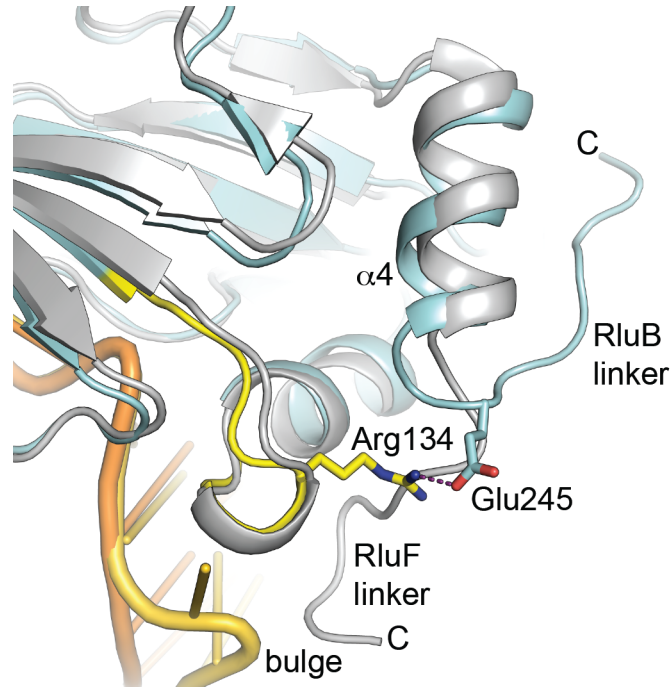

**Figure S1.** Overlay of the RluB and RluF RNA complexes in the vicinity of the bulge. RluB and its RNA substrate are in blue-green and gold, respectively. RluF and its RNA substrate are grey and orange, respectively. The  $\alpha 1$ - $\beta 4$  linking residues 131-138 in RluB are highlighted in yellow. In RluB Arg134 hydrogen bonds to Glu245, reinforcing a hairpin turn that directs the chain away from the bulge-binding site.

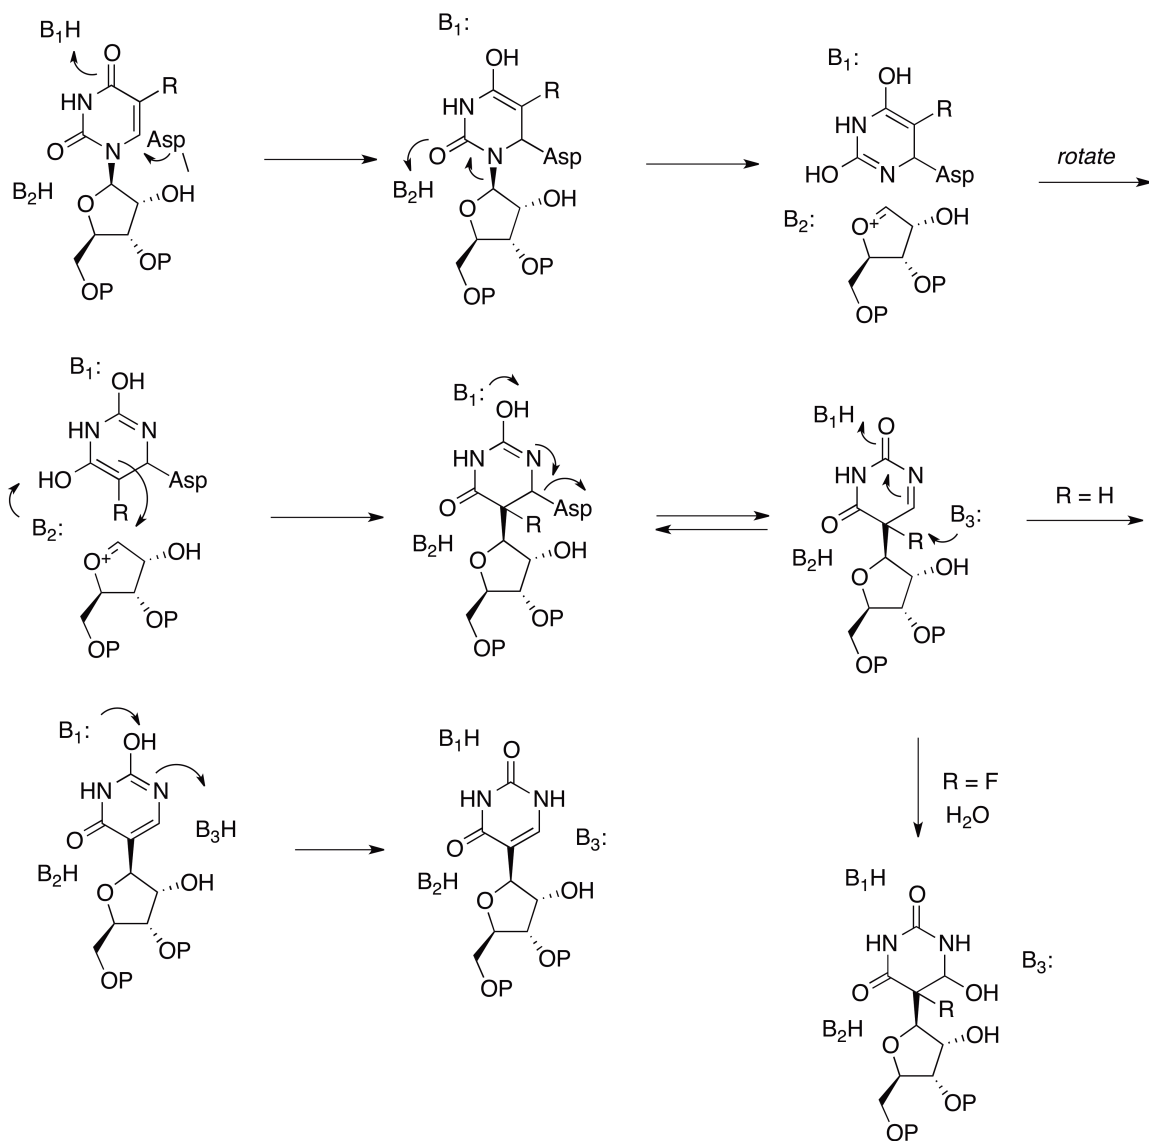

**Scheme S1. Proton transfers during  $\Psi$  formation**
